1     **Characterization of the virome of shallots affected**  
2     **by the shallot mild yellow stripe disease in France**

3

4

5     Armelle Marais\*, Chantal Faure, Sébastien Theil, Thierry Candresse

6

7

8

9     UMR 1332, Biologie du Fruit et Pathologie, INRA, Université de Bordeaux, Villenave

10    d'Ornon, France

11

12

13

14    \* Corresponding author

15    E-mail : [armelle.marais-colombel@inra.fr](mailto:armelle.marais-colombel@inra.fr) (AM)

16

17

18    **Short title:** Novel Poty- and Carlavirus of Shallot

19

20

## 21 **Abstract**

22 To elucidate the etiology of a new disease on shallot in France, double-stranded  
23 RNAs from asymptomatic and symptomatic shallot plants were analyzed by high-  
24 throughput sequencing (HTS). Contigs annotation, molecular characterization and  
25 phylogenetic analyses revealed the presence in symptomatic plants of a virus complex  
26 consisting of shallot virus X (ShVX, *Allexivirus*), shallot latent virus (SLV, *Carlavirus*)  
27 and two novel viruses belonging to the genera *Carlavirus* and *Potyvirus*, for which the  
28 names of shallot virus S (ShVS) and shallot mild yellow stripe associated virus  
29 (SMYSaV), are proposed. Complete or near complete genomic sequences were  
30 obtained for all these agents, revealing divergent isolates of ShVX and SLV. Trials to  
31 fulfill Koch's postulates were pursued but failed to reproduce the symptoms on  
32 inoculated shallots, even though the plants were proved to be infected by the four  
33 viruses detected by HTS. Replanting of bulbs from SMYSaV-inoculated shallot plants  
34 resulted in infected plants, showing that the virus can perpetuate the infection over  
35 seasons. A survey analyzing 351 shallot samples over a four years period strongly  
36 suggests an association of SMYSaV with the disease symptoms. An analysis of  
37 SMYSaV diversity indicates the existence of two clusters of isolates, one of which is  
38 largely predominant in the field over years.

39

40 **Keywords:** shallot, *Allium*, *Potyvirus*, *Carlavirus*, *Allexivirus*, high-throughput  
41 sequencing, etiology

42

43 The sequences reported in the present manuscript have been deposited in the  
44 GenBank database under accession numbers MG571549, MH292861, MH389247 to  
45 MH389255, and MG910501 to MG910598.

## 46 Introduction

47 Economically important cultivated *Allium* species are garlic (*Allium sativum*), leek  
48 (*Allium ampeloprasum* var. *porrum*), onion (*Allium cepa*), and its relative shallot (*Allium*  
49 *cepa* L. var. *aggregatum*) [1]. Shallot is mainly cultivated for culinary purposes, while  
50 onion and garlic are also used in traditional medicine. Viral infections are a significant  
51 problem for all *Allium* crops, even more so in the case of shallot and garlic which are  
52 exclusively vegetative propagated, leading to the accumulation of viruses in planting  
53 material [2]. Due to their prevalence and the damages they cause, the most  
54 economically important *Allium* viruses are members of the genus *Potyvirus*, particularly  
55 onion yellow dwarf virus (OYDV) and leek yellow stripe virus (LYSV). In the  
56 Mediterranean basin, shallot yellow stripe virus (SYSV) and turnip mosaic virus (TuMV)  
57 have also been described infecting *Allium* species, as well as four other potyviruses of  
58 lower incidence, even though TuMV has not been reported on shallot so far [2].  
59 Potyviruses and carlaviruses are transmitted non persistently by aphids and frequently  
60 found on cultivated *Allium* species. The first described *Allium*-infecting carlavirus was  
61 shallot latent virus (SLV, synonym with garlic latent virus, GLV), which seems to be  
62 asymptomatic in garlic, onion and shallot when in single infection but can cause  
63 significant yield losses in the presence of potyviruses due to synergistic effects [3].  
64 Another carlavirus (garlic common latent virus, GarCLV) is frequently detected on  
65 garlic, onion and leek, associated with symptomless infection. Eight viral species  
66 belonging to the genus *Allexivirus* in the family *Alphaflexiviridae* have also been  
67 described from *Allium* species. Only two of them, shallot virus X (ShVX) and shallot  
68 mite-borne latent virus (SMbLV) have been described in shallot, in which they cause  
69 latent infections. All allexiviruses are transmitted by mites and coinfections with  
70 potyviruses and carlaviruses are frequent, with potential synergistic effects that could

71 lead to increased damages [2]. Besides the viruses belonging to the *Allexivirus*,  
72 *Potyvirus*, and *Carlavirus* genera, five other viruses infecting *Allium* species have been  
73 described, generally with limited incidence, including iris yellow spot virus (IYSV), a  
74 member of the genus *Orthospovirus*, reported on shallot [4].

75 In 2012, a new disease was observed in the west of France in shallots. Symptoms  
76 consisted of yellow stripes on the leaves, associated with a loss of vigor, considered  
77 as moderate as compared to that caused by OYDV or LYSV (Fig 1). This gave its name  
78 to the disease, shallot mild yellow stripe disease (SMYSD). Early tests revealed that  
79 the new disease could be observed in plants that test negative for OYDV and LYSV,  
80 indicating that these two viruses were not involved. In parallel, meristem-tip culture  
81 from symptomatic plants led to the disappearance of the symptoms, reinforcing the  
82 hypothesis of a viral etiology. The present study was therefore initiated with the  
83 objective to identify the causal agent(s) of this new disease.

84

85 **Fig 1. Symptoms associated with the shallot mild yellow stripe disease on shallot**  
86 **plant.**

87

88

## 89 **Materials and methods**

### 90 **Plant samples**

91 Six samples (13-01 to 13-06) of shallot (*Allium cepa* L. var. *aggregatum*) were  
92 collected in West France in 2013 and analyzed by high-throughput sequencing (HTS).  
93 Two of these samples were from asymptomatic plants while the other four showed  
94 symptoms of the novel SMYS disease. In addition to these samples analyzed by HTS,  
95 a total of 351 symptomatic or asymptomatic shallot samples was collected over a four-  
96 year period (2014 to 2017) and screened for the presence of OYDV, LYSV and for the  
97 novel viruses detected in the present study. The symptoms observed on these plants  
98 were recorded using a 0 to 3 notation scale for both leaf striping and loss of vigor. The  
99 “0” score is defined as no symptom, the “3” score is defined as a symptomatology  
100 equivalent to that observed on control plants infected by OYDV. The “1” and “2” scores  
101 are used for symptoms of intermediate intensity.

102

### 103 **Illumina sequencing of double-stranded RNAs from shallot** 104 **samples**

105 Double-stranded RNAs (dsRNAs) were purified from the two asymptomatic  
106 plant samples (13-01 and 13-02) and the four symptomatic ones (13-03 to 13-06),  
107 following the protocol previously described [5]. After reverse transcription and random  
108 amplification, the obtained cDNAs were used for the preparation of libraries and  
109 sequenced in multiplex format (Illumina HiSeq 2000 in paired end 2x 100 nt reads).  
110 After quality trimming and demultiplexing steps [6], reads were assembled into contigs  
111 which were annotated by BlastN and BlastX comparisons [7] against the GenBank  
112 database using CLC Genomics Workbench 8. When needed, contigs corresponding

113 to particular agents were further extended by several rounds of mapping of  
114 unassembled reads and/or assembled manually into scaffolds by alignment against  
115 reference viral genomes identified during the Blast analyses.

116

## 117 **Total nucleic acids extraction and detection of selected** 118 **viruses by RT-PCR**

119 Total nucleic acids were extracted from shallot samples and from the test plants  
120 of the host range experiments using the silica-capture procedure 2 described by [8].  
121 The viruses were detected by two-step RT-PCR assays, following the procedure  
122 already described [9] and using specific primers (Table S1). The amplified fragments  
123 were visualized on non-denaturing 1% agarose gels and, if needed, submitted to direct  
124 Sanger sequencing on both strands (GATC Biotech, Mulhouse, France).

125

## 126 **Completion of the genome sequences of the novel viruses** 127 **and of divergent isolates of shallot latent virus (SLV) and** 128 **shallot virus X (ShVX)**

129 The 5' ends of the viral genomes sequences were determined or confirmed  
130 using the 5' Rapid Amplification of cDNA Ends (RACE) strategy and internal primers  
131 designed from the genomic contigs (Table S1) following the kit supplier's  
132 recommendations (Takara Bio Europe/Clontech, Saint Germain-en-Laye, France).  
133 The 3' ends were amplified using forward internal and polyA-anchored LD primers  
134 (Table S1) as described [10]. Internal gaps and regions of low coverage were  
135 determined or confirmed by direct sequencing of RT-PCR fragments obtained using  
136 internal primers designed from the contigs (Table S1). All amplified fragments were

137 visualized on non-denaturing agarose gels and directly sequenced on both strands by  
138 Sanger sequencing (GATC Biotech).

139

## 140 **Sequence analysis, comparisons, and phylogenetic** 141 **analyses**

142 Phylogenetic and molecular evolutionary analyses were conducted using  
143 MEGA version 6 [11]. Multiple alignments of nucleotide or amino acid sequences were  
144 performed using the ClustalW program [12] as implemented in MEGA6. Phylogenetic  
145 trees were reconstructed using the neighbor-joining method with strict nucleotide or  
146 amino acid distances and randomized bootstrapping for the evaluation of branching  
147 validity. Mean diversities and genetic distances (p-distances calculated on nucleotide  
148 or amino acid identity) were calculated using MEGA6.

149

## 150 **Host range determination for both novel viruses**

151 A mix of leaves from four plants identified as infected by the novel potyvirus but  
152 not by the novel carlavirus, OYDV or LYSV was used as the first inoculum. Similarly,  
153 a mix of leaves from four plants known to be infected by the new carlavirus but free of  
154 the new potyvirus, of OYDV or LYSV was used as the second inoculum. All pools of  
155 leaves were ground 1:4 (wt/vol) in a solution of 0.03 M Na<sub>2</sub>HPO<sub>4</sub> containing 0.2%  
156 sodium diethyldithiocarbamate (DIECA), and 100 mg each of carborundum and  
157 activated charcoal were added before rub-inoculation. A total number of 59 *Nicotiana*  
158 *benthamiana* plants, 48 *Chenopodium quinoa*, 34 *C. amaranticolor*, 31 *N. occidentalis*,  
159 and 23 *N. tabacum* cv xanthi were evaluated as potential hosts for the novel potyvirus  
160 and 23 plants of each species were used for trials involving the new carlavirus. The

161 appearance of symptoms was monitored over a three-week period. At the end of the  
162 experimentation, the presence of the virus(es) in non-inoculated parts of the test plants  
163 was assessed by specific RT-PCR assays.

164

## 165 **Trials to fulfill Koch's postulates**

166 Koch's postulates were evaluated separately for the two novel viruses and for a  
167 complex of four viruses (ShVX, SLV and the two novel viruses). A total of 21 virus-free  
168 shallots grown from seeds were inoculated with a mix of four plants shown to be co-  
169 infected by ShVX, SLV and the novel carlavirus and potyvirus. Plants were monitored  
170 for symptoms appearance over a five weeks period post inoculation. At the end of this  
171 period, the plants were tested by specific RT-PCR for the presence of the four  
172 inoculated viruses. In parallel, inoculation of shallot and onion plants was performed  
173 with an inoculum constituted of a pool of four plants known to be infected by the sole  
174 new potyvirus (63 and 40 plants of each *Allium* species, all grown from seeds) or  
175 infected only by the novel carlavirus (36 and 23 plants, respectively). A mix of leaves  
176 from two plants infected with the sole OYDV was used as a positive mechanical  
177 inoculation control. Bulbs from all inoculated shallot plants were replanted and the  
178 resulting plants observed over an eight months period and tested for the presence of  
179 inoculated viruses.

180

## 181 **Results**

### 182 **Illumina sequencing of double-stranded RNAs extracted** 183 **from asymptomatic and symptomatic shallot samples**



184 After demultiplexing, quality trimming, and *de novo* assembly, BlastN and BlastX  
185 comparisons of the contigs obtained with the GenBank database showed that all  
186 sources but one (13-01) were infected by more than one viral species (Table 1). For  
187 the 13-01 asymptomatic sample, 174,381 reads were integrated into contigs with high  
188 homology to isolates of shallot virus X (ShVX, genus *Allexivirus*, family  
189 *Alphaflexiviridae*). Two variants of ShVX were identified and reassembled from that  
190 plant, differing by their level of nucleotide (nt) identity with known ShVX sequences.  
191 Most of the reads (151,580) were integrated into contigs (hereafter referred to as ShVX  
192 13-01 variant 1) closely related to ShVX isolate JX310755 (97-98% of nt identity  
193 depending on the contigs). More divergent contigs (hereafter referred to as ShVX 13-  
194 01 variant 2) integrating 22,801 reads could also be assembled. They showed between  
195 82 and 90% of nt identity with JX310755, depending on the contig (Table 1). In the  
196 other asymptomatic sample (13-02), two viruses were detected: a divergent isolate of  
197 shallot latent virus (SLV, genus *Carlavirus*, family *Betaflexiviridae*), integrating 249,097  
198 reads and sharing around 83% of nt identity with reference SLV isolates, and a putative  
199 novel carlavirus. Indeed, a total of 27,786 reads (corresponding to 1.9% of the total  
200 reads) were integrated into contigs sharing relatively weak nt identities (71-75%  
201 depending on the contig) with various carlaviruses. In the four symptomatic samples  
202 (13-03 to 13-06), besides the presence of one or more of the above viruses (Table 1),  
203 contigs integrating between 43,683 and 105,209 reads depending on the sample and  
204 showing at most 74% of nt identity with leek yellow stripe virus (LYSV, genus *Potyvirus*,  
205 family *Potyviridae*) were detected, leading to the hypothesis of the presence of a novel  
206 potyvirus.

207 In the end, the complete genomic sequences of seven viral isolates were  
208 obtained (Table 1): ShVX variant 1 from samples 13-05 and 13-06, ShVX variant 2

209 from sample 13-04, SLV from samples 13-02 and 13-06, the novel carlavirus from  
210 sample 13-05 and the novel potyvirus from sample 13-06. Moreover, near complete  
211 genome sequences of three additional ShVX isolates (two from sample 13-01, and one  
212 from sample 13-04) and of one additional SLV isolate (from sample 13-03) were also  
213 obtained during the assembly process (Table 1) but no specific effort was made to  
214 complete their missing 5' and 3' genome ends.

215 Besides the whole genome sequence determined for the novel carlavirus,  
216 scaffolds of 8,234-8,303 nt and having up to four short internal gaps and missing short  
217 terminal sequences were also assembled from samples 13-02, 13-03, and 13-04. In  
218 parallel, besides the determined complete genome sequence of the novel potyvirus,  
219 scaffolds of 10,318-10,360 nt and containing up to four short internal gaps were also  
220 assembled from the other infected samples (13-03, 13-04, 13-05).

221

222 **Table 1. Number and percentages of high-throughput sequencing reads (73 nucleotides average length) of shallot virus X**  
 223 **(variants 1 and 2), shallot latent virus, the novel carlavirus and the novel potyvirus in each sample analyzed by Illumina**  
 224 **sequencing.**

| Sample <sup>a</sup> | Total reads<br><sup>b</sup> | Shallot virus X                         |                                        | Shallot latent virus                     | Novel carlavirus           | Novel potyvirus |
|---------------------|-----------------------------|-----------------------------------------|----------------------------------------|------------------------------------------|----------------------------|-----------------|
|                     |                             | Variant 1                               | Variant 2                              |                                          |                            |                 |
| 13-01 AS            | 328,460                     | 151,580 (46%)<br>MH389253 <sup>c</sup>  | 22,801 (6.9%)<br>MH389254 <sup>e</sup> |                                          |                            |                 |
| 13-02 AS            | 1,412,128                   |                                         |                                        | 249,097 (17.6%)<br>MH389247              | 27,786 (1.9%)              |                 |
| 13-03 S             | 505,315                     |                                         |                                        | 236,815 (46.9%)<br>MH389249 <sup>f</sup> | 13,684 (2.7%)              | 105,209 (20.8%) |
| 13-04 S             | 438,574                     | 60,019 (13.7%)<br>MH389255 <sup>d</sup> | 158,755 (36.2%)<br>MH389250            |                                          | 86,627 (19.7%)             | 48,064 (11%)    |
| 13-05 S             | 360,248                     | 139,070 (38.6%)<br>MH389251             |                                        |                                          | 81,900 (22.7%)<br>MH292861 | 43,683 (12.1%)  |

|         |         |               |  |               |  |              |
|---------|---------|---------------|--|---------------|--|--------------|
| 13-06 S | 778,696 | 34,273 (4.4%) |  | 257,193 (33%) |  | 86,044 (11%) |
|         |         | MH389252      |  |               |  | MG910502     |

225 Relevant GenBank accession numbers are indicated

226 <sup>a</sup> AS asymptomatic; S symptomatic

227 <sup>b</sup> After quality trimming

228 <sup>c</sup> genome sequence lacks 53 nt at the 5' end and 443 nt at the 3' end

229 <sup>d</sup> genome sequence lacks 7 nt at the 5' end and 111 nt at the 3' end

230 <sup>e</sup> genome sequence lacks 53 nt at the 5' end and 330 nt at the 3' end

231 <sup>f</sup> genome sequence lacks 84 nt at 5' end and 34 nt at 3' end

## Genomic organization and phylogenetic relationships of the novel potyvirus

The potyviral genome determined from sample 13-06 is 10,540 nt excluding the poly (A) tail and encodes a polyprotein of 3,210 amino acids (aa) (Fig 2A). The 5' non coding region (NCR) is 159 nt long, whereas the 3' NCR is 751 nt long, which is significantly longer than for most potyviruses [13]. Based on the conserved cleavage sites in the polyprotein sequence [14], the ten typical mature potyviral proteins could be identified with estimated sizes of 422 aa (P1), 456 aa (HC-Pro, helper component proteinase), 359 aa (P3), 52 aa (6K1), 635 aa (CI, cylindrical inclusion protein), 53 aa (6K2), 192 aa (VPg, viral genome-linked protein), 242 aa (NIa, nuclear inclusion a), 513 aa (NIb, nuclear inclusion b), and 286 aa (CP, coat protein). The observed cleavage sites in the polyprotein sequence were consistent with the known sites of potyviruses (Fig 2A). In addition, a PIPO ORF (69 aa) was identified downstream of the conserved slippage motif GAAAAA (nt position 3283). All expected potyviral conserved motifs were identified in the polyprotein, including in the HC-Pro the KITC (aa position 472 to aa 475) and PTK (730 to 732) and in the CP the conserved DAG that are all necessary for aphid transmission [15].

**Fig 2. Schematic representation of the genomic organization of the novel potyvirus (A) and the novel carlavirus (B).** The open reading frames are depicted by large boxes, and the Non Coding Regions (5' and 3' NCR) by horizontal lines. (A)<sub>n</sub>: PolyA tail. (A) The nine putative cleavage sites of the polyprotein are indicated, as well as the predicted amino acid position for each mature protein in the polyprotein. P1, helper component proteinase (HCPro), P3, 6K1, cylindrical inclusion (CI) protein, 6K2,

viral genome-linked protein (VPg), nuclear inclusion a (NIa), nuclear inclusion b (NIb), and coat protein (CP). The position of PIPO (Pretty Interesting Potyviridae ORF) is also indicated. The black ellipse represents the VPg attached to the 5' end of the genome. (B) Conserved motifs for viral methyltransferase (pfam 1660, Met), 2OG-Fe(II) oxygenase (pfam 03171, 2OG), peptidase C23 (pfam 05379, Pep), viral helicase 1 (pfam 01443, Hel), and RNA-dependent RNA polymerase 2 (pfam 00978, RdRp) domains are shown within replicase. TGB 1, 2, 3, Triple gene block proteins 1, 2, and 3. CP, coat protein. NABP, nucleic acid binding protein.

In order to determine the taxonomic relationships of this virus, a phylogenetic tree was reconstructed using the genomic sequences of representative members of the family *Potyviridae* (from P3 to CP genes, corresponding to the RNA1 of bymoviruses, Fig 3A). Sequence comparisons were then performed with the polyprotein, the coat protein, and the NIa-Pro-NIb genomic region and corresponding proteins of members of the genus *Potyvirus* (Table S2). The accepted molecular species demarcation criteria for the family *Potyviridae* are less than 76% nt identity or 82% aa identity in the large ORF or its protein product [16]. By all the criteria, the detected potyvirus appears to be a distinct species, with clearly more distant identity levels with its closest fully sequenced relative, LYSV [at the best 68.8% nt identity in the large ORF (73.6% aa); (Table S2)]. The name of shallot mild yellow stripe associated virus (SMYSaV) is therefore proposed for this novel potyvirus.

**Fig 3. Unrooted phylogenetic trees based on the codon-aligned nucleotide sequences of the 3' part (from P3 to coat protein) of the polyproteins of representative *Potyviridae* family members (A) and on the coat protein**

**sequences of representative members of the genus *Potyvirus* (B).** The trees were constructed using the neighbor-joining method and statistical significance of branches was evaluated by bootstrap analysis (1,000 replicates). Only bootstrap values above 70% are shown. The scale bar represents 5% nucleotide divergence (A) or 5% amino acid divergence (B). The genus to which each virus belongs is indicated at the right of the panel A. The novel potyvirus shallot mild yellow stripe associated virus is indicated by a black star.

In a phylogenetic analysis of the CP amino acid sequences, SMYSaV forms a small bootstrap-supported cluster with garlic virus 2, leek yellow stripe virus, and garlic mosaic virus (Fig 3B), forming a small group of agents of similar host specificity as observed for other potyviruses. The closest sequence to SMYSaV identified through GenBank Blast searches is a partial, 2,525 nt genome fragment (GenBank accession number L28079) corresponding to the partial protease (NIa-Pro) and RNA-dependent RNA polymerase (NIb) genes of a viral isolate from shallot (unpublished GenBank sequence). Over this region, the two agents show 92.3% nt (94.3% aa) identity (Table S2), indicating that they belong to the same species. Remarkably the L28079 sequence was described in GenBank database as “shallot potyvirus (probably Onion yellow dwarf virus)” indicating that SMYSaV had been observed previously in shallot in Russia but that its originality and distinctness had not been recognized at the time.

The four symptomatic samples analyzed by HTS in the present study were all found to be infected by SMYSaV (Table 1), allowing the reconstruction of long scaffolds for each isolate. Comparison of these four sequences provides nt identity values ranging from 97.1% and 99.7% (data not shown), giving a first vision of the diversity of this novel virus.

## Genomic organization and phylogenetic affinities of the novel carlavirus

Widely different amounts of carlaviral reads were detected in four of the six samples analyzed by HTS (one asymptomatic and three symptomatic, Table 1). The genomic sequence was completed for the sample showing the deepest coverage (sample 13-05, representing 22.7% of the total reads). A unique contig, 8,343 nt-long and only missing a short region at the 3' end (as judged by comparison with SLV), was reconstructed. The 5' end was confirmed and the 3' end was determined by RACE experiments. The genome organization is typical of members of the genus *Carlavirus*, with six ORFs encoding from 5' to 3' the viral replicase (REP), the triple gene block proteins (TGB1, 2, 3) involved in viral movement, the coat protein and, finally, a nucleic acid binding protein, whose role is still unclear (Fig 2B). The sizes of the deduced proteins are identical to those of the most closely related carlavirus (SLV), with the exception of the replicase which is slightly larger than in SLV (1,926 aa vs 1,924 aa) with 12 indels located in the first part of the deduced protein (data not shown). The conserved motives typical for carlaviral REPs [17] were identified, including a viral methyltransferase domain (pfam 1660, aa 42-352), an AlkB (2OG-Fell-Oxy-2) domain (pfam 03171, aa 681-769), a peptidase C23 (carla endopeptidase) domain (aa 930-1015), a viral helicase 1 domain (pfam 01443, aa 1108-1380) and a RNA-dependent RNA polymerase 2 domain (pfam 1505-1913, aa 1505-1913).

The taxonomical position of the novel carlavirus was confirmed by phylogenetic analyses performed with complete genome sequences of representative members of the families *Alphaflexiviridae* and *Betaflexiviridae* (Fig 4) and with replicase and coat protein sequences from a range of carlaviruses (data not shown). As shown in Fig 4, the carlavirus unambiguously clusters with related members in the family



*Betaflexiviridae*. In this and in the other two trees (not shown), it clusters together with SLV with 100% bootstrap support, making SLV its closest relative in the genus. However, the level of identity between SLV and the novel carlavirus in replicase and coat protein genes (and deduced proteins) is clearly below the species demarcation threshold accepted for the family *Betaflexiviridae* (72% nt or 80% aa identities in replicase or CP genes) [18]. Indeed, it shares at the best 76.5% of aa identity in the CP with SLV (69.6% nt identity, Table S3), demonstrating that it represents a novel species in the genus *Carlavirus*, for which the name of shallot virus S (ShVS) is proposed.

**Fig 4. Neighbor-joining phylogenetic tree reconstructed from the alignment of complete genome sequence of representative members of the families *Alphaflexiviridae* and *Betaflexiviridae*.** Statistical significance of branches was evaluated by bootstrap analysis (1,000 replicates) and only values above 70% are indicated. The scale represents 5% nucleotide divergence. The genus and the family to which each virus belongs are indicated at the right of the figure. The sequences of shallot virus X and shallot latent virus determined in this work are underlined, and the novel carlavirus shallot virus S is indicated by a black triangle.

## **Analysis of the shallot virus X isolates identified by HTS**

Six ShVX isolates were identified from four samples, three for which full genome sequences were obtained and three for which very long contigs, lacking only genome ends, were reconstructed (Table 1). The phylogenetic analysis based on the alignment of the complete genome sequences of *Alphaflexiviridae* members clearly shows that all the sequences reported here belong to the *Shallot virus X* species, forming a cluster

supported by a high bootstrap value (Fig 4). The phylogenetic analysis based on the CP sequences of allexivirus members and of the available ShVX isolates retrieved from GenBank confirmed this conclusion (Fig S1). Moreover, the sequences reported here shared between 79.9% and 97.5% of nt identity (87% to 98.9% aa identity) in the CP gene with reference isolates (data not shown), levels of identity which are within the molecular species demarcation criteria accepted for the family *Alphaflexiviridae* [18]. This conclusion is confirmed by similar analyses performed with polymerase sequences (data not shown). In the CP tree (Fig S1), four isolates (13-01 variant 1, 13-04 variant 1, 13-05, and 13-06) belong to a cluster comprising six already known ShVX isolates including the only available shallot mite-borne latent virus sequence, which should probably be considered a synonym of ShVX [19]. On the other hand, the two other isolates (13-01 and 13-04 variant 2) form a divergent cluster, away from other known ShVX isolates and from the isolates found in co-infection in the same original plants (Fig S1). These two isolates are very closely related (99.9% nt identity in the CP gene) and more distant from other isolates (83.5% to 85.5% nt identity, depending on the isolate considered), including the highly divergent Dindugal isolate GQ268322, 80.2% nt identity).

## **Analysis of the shallot latent virus isolates identified by HTS**

SLV was identified in three samples. Complete genome sequences were determined from two of them (SLV 13-02 and 13-06) while for the remaining isolate (SLV 13-03), a very long contig missing only 84 nt and 34 nt at the 5' and 3' ends, respectively was obtained. The isolates analyzed here clearly cluster in the *Shallot latent virus* species (Fig 4) but form a distinct and novel cluster well separated from other known isolates of the virus. For the CP gene, the diversity between them and

other SLV isolates ranges between 17.6 and 24.3% in nt (between 5.1 and 10.1% in aa). Although significant, these values are well within the species demarcation criteria for the *Betaflexiviridae* family [17]. The three isolates of SLV analyzed here are very closely related to each other with nt identity levels comprised between 93.7 and 100% in the CP gene (99 to 100% in aa for deduced proteins, data not shown). Similar values are observed in the REP gene (90.9 to 99.8% in nt, 96.1 to 99.8% in aa).

## Host range of both novel viruses and Koch's postulates

Trials to mechanically transmit ShVS to herbaceous dicot plants (*N. benthamiana*, *N. occidentalis*, *C. quinoa* and *C. amaranticolor*) were unsuccessful. Similar negative results were obtained with SMYSaV: no symptoms were visible on any of the SMYSaV-inoculated plants and no virus could be detected by a specific RT-PCR assay in any of the inoculated dicot hosts.

We then tried to fulfill Koch's postulates, either using each novel virus alone or using a viral complex composed of ShVX, SLV and the two novel viruses. A pool of four plants known to harbor this complex was used to inoculate a total of 21 shallot plants. Most of the inoculated plants (14/21) were found to be co-infected by the four viruses, but no symptoms could be observed in any of the inoculated plants. Concerning the inoculation of the novel viruses alone, ShVS was detected in 100% of the inoculated onion plants and in 29/36 of the inoculated shallots. After five weeks of observation, no symptoms were recorded on inoculated plants, an observation in line with the finding of ShVS in one of the asymptomatic plants analyzed by HTS (Table 1). Similarly, SMYSaV was detected in 75% of the inoculated shallots and in 100% of the inoculated onion plants. However, no symptoms could be observed in the infected plants. As a positive control, leaves from OYDV-infected shallots, but free of SMYSaV,

were used to inoculate shallot and onion plants. Five weeks after inoculation, typical yellow mosaic symptoms were observed on both hosts and OYDV was detected in the symptomatic plants by specific RT-PCR (data not shown). Bulbs from all SMYSaV-inoculated shallot plants were replanted and most of the resulting (19/20) plants were found to be infected by SMYSaV, showing that the virus accumulates in the bulbs and can perpetuate the infection over seasons. However, neither the first generation nor second generation plants displayed symptoms under our greenhouse conditions, even after eight months of observation.

## **Correlation between virus presence and the symptoms associated with the shallot mild yellow stripe disease**

Despite the negative results of the Koch's postulate trials, which do not allow to conclude about a causal role of SMYSaV, the results of the HTS analyses strongly suggest its involvement in the disease, since it is the only virus that was specifically associated with the four symptomatic plants analyzed (Table 1). In order to try to confirm an association between SMYSaV and the SMYS disease symptoms, a correlative analysis involving a large number of plants was performed. Over a period of four years, a total of 351 shallot samples originating from the same region of France were analyzed for the presence of SMYSaV, LYSV and OYDV using specific RT-PCR assays (Table S1). Twenty-two samples were found to be infected by OYDV or/and LYSV, with a mean of striping score of  $2.43 \pm 1.03$  and a mean score of  $1.5 \pm 1.46$  for the loss of vigor. In the remaining samples, the incidence of SMYSaV was found to be quite high (27.2%) and was highly correlated with the presence of striping symptoms. Indeed, 92.9% of the samples with stripes (score between 1 and 3) were infected by SMYSaV (78/84), whereas 95.9% of the asymptomatic samples were SMYSaV-free

(235/245). The mean score of stripe symptoms for the SMYsSaV-infected samples ( $2.39 \pm 0.98$ ) was not significantly different from that of OYDV/LYSV-infected samples ( $2.43 \pm 1.03$ ) (Fig 5), indicating that SYMSaV could have the same impact on infected plants in terms of striping severity than the two other potyviruses OYDV and LYSV. In contrast, the effect of SYMSaV infection regarding the loss of vigor is significantly lower ( $p = 0.0004$ ) than that of OYDV/LYSV infection (Fig 5), strongly suggesting that the symptoms of the SMYSD consisting of yellow stripes on leaves and moderate loss of vigor are associated with SMYsSaV.

On a smaller number of analyzed plants (45), the potential contribution of ShVS to the symptomatology was also assessed. The prevalence of this virus was found to be high in the analyzed samples (53.3%) but the infection was not correlated with symptomatology. Indeed, the same proportion of symptomatic or asymptomatic samples from the correlative study were found to be infected by ShVS (48.8% vs 50%, respectively).

**Fig 5. Comparison of the mean of symptom score (striping and loss of vigor) in two populations of shallot plants.** OYDV+/LYSV+/SMYsSaV-: plants infected by onion yellow dwarf virus and/or leek yellow stripe virus and free of shallot mild yellow stripe associated virus. OYDV-/LYSV-/SMYsSaV+: plants infected by shallot mild yellow stripe associated virus and free of onion dwarf virus and leek yellow stripe virus. Whiskers indicate the standard error of the mean. The significance ( $p$ ) was tested by the Mann-Whitney-Wilcoxon non parametric test [20-21].

The diversity of SMYsSaV was also analyzed, using the nucleotide sequence of a short fragment of the CP gene targeted by the RT-PCR diagnostic assay. The

average pairwise nucleotide divergence was 1.4% between isolates in this region. More interestingly, the diversity could be structured into two distinct clusters, as illustrated by the neighbor-joining tree shown in Fig S2. Beside the major group (cluster 1) which contains 91% of the isolates, an additional group (cluster 2) could be defined with high bootstrap support (99%). The intra-group average nucleotide divergence is very low (0.7% and 0.5% for clusters 1 and 2, respectively), in comparison with the inter-group average divergence (5.2%). Due to the small number of isolates in the cluster 2, no conclusion could be drawn in terms of correlation between a particular SMYsAV cluster and the severity of the induced symptoms.

## Discussion

The present study was motivated by reports of a yellow stripe disease on shallot varieties regenerated from OYDV- and LYsV-free bulbs. Subsequent meristem-tip cultures resulted in the clearance of the symptoms, suggesting a viral etiology. The objective of this work was therefore to identify the virus(es) involved in this newly described disease by a combination of HTS-based and classical approaches. Analysis of six shallot samples (two asymptomatic and four symptomatic) by HTS of purified dsRNAs revealed the presence of two viruses already known to give asymptomatic infections in shallot (SLV and ShVX) and of two novel viruses: a carlavirus named ShVS and a potyvirus named SMYsAV. A partial sequence was already available in GenBank (L28079) for the potyvirus, reported with an uncertain taxonomy as probably belonging to the *Onion yellow dwarf virus* species. The determination of the complete genome sequence and phylogenetic analyses clearly show that this potyvirus is a novel species distinct from OYDV. The genomic organization of ShVS and SMYsAV are similar to those of *Carlavirus* and *Potyvirus* genera members, respectively.

Interestingly, the 3' NCR of SMYsSaV with a size of 751 nt is significantly longer than reported for potyviruses (around 220 nt, Adams et al. 2012c). Other potyviruses belonging to the same phylogenetic cluster (Fig 3B) share this property, with a 3' NCR size of 592 nt for LYSV and 598 nt for garlic virus 2 (no data available for garlic mosaic virus). The biological significance of this observation remains unclear, if any. Nevertheless, the role of the 3' NCR as a determinant of symptom induction has been proposed in a few examples [22], without any hypothesis about the mechanism(s) involved [23].

The six ShVX genome sequences (including three near-complete ones lacking only some nucleotides at both extremities) determined in the present study provide new insights into the diversity of ShVX. Besides five isolates clustering into a phylogenetic group comprising all the known ShVX isolates, two isolates (ShVX 13-04 variant 2 and ShVX 13-01 variant 2, very closely related to each other) were found to be significantly more distant from “classical” isolates, and define a new phylogenetic cluster, providing evidence for a wider diversity than previously known [24]. Similarly, three complete genome sequences (near-complete for one) of SLV were determined through this study, representing isolates from a new phylogenetic cluster and extending the known diversity range of this virus.

The novel potyvirus described here is the sole detected virus associated with the symptoms of the SMYSD. Firstly, SMYsSaV was found in the four symptomatic samples and not in the asymptomatic ones, which is not the case for any of the other viruses detected. Secondly, the correlative study conducted over a four-year period showed a strong association of SMYsSaV with the symptoms observed. In particular, SMYsSaV infection is strongly associated with striping symptoms, with a severity comparable to those caused by OYDV and/or LYSV infection; on the other hand, the

impact of SMYSaV infection in terms of loss of vigor is moderate, as reported for the SMYSD, and quite different from the more severe loss of vigor associated with OYDV and/or LYSV infection (Fig 5). The four symptomatic samples analyzed by HTS were infected with a complex of viruses, which is coherent with the strictly vegetative mode of propagation of shallot. Depending on the sample, various combinations of agents were found, involving SMYSaV and ShVS, ShVX and/or SLV (Table 1). On this basis, trials to fulfill Koch's postulates were pursued involving either SMYSaV alone, ShVS alone or a complex of the four viruses found in symptomatic shallots. However, even over a long period of observation, no symptoms were observed on any of the inoculated shallot, even if most of them were found to be infected by the virus(es) they had been inoculated with. Two hypotheses can be proposed to explain the failure to observe symptoms on the inoculated plants, one is that the greenhouse conditions used would not allow the development of such symptoms. The other is that the shallot variety used in these experiments (a seed-propagated variety, different from the bulb-propagated ones in which the disease is described) may not be conducive to symptoms.

In the HTS analysis, the novel carlavirus ShVS was detected in three symptomatic samples as well as in an asymptomatic one, suggesting that as for other shallot infecting carlaviruses, its infection is latent. This hypothesis is confirmed by the finding that the virus was equally distributed between symptomatic and asymptomatic plants in the correlation study. Our results do not allow us to conclude regarding a potential synergistic effect of ShVS with SMYSaV infection, as shown for SLV and GarCLV with potyviruses [2]. Overall, the very tight correlation between SMYSaV infection and the SMYSD symptoms support the notion of an association if not a causal role for SMYSaV, but further experiments are necessary to unambiguously



demonstrate it and to explore potential synergistic effects with other co-infecting viruses.

## Acknowledgements

The authors would like to thank the GenomEast platform (Institut de Génétique et de Biologie Moléculaire et Cellulaire, CNRS/INSERM/Université de Strasbourg, Illkirch, France) for the Illumina sequencing, and T. Mauduit and C. Chesseron for taking care of experimental plants.

## References

1. Brewster JL. Onions and other vegetable alliums. CAB International, Oxon, UK; 1994.
2. Katis NI, Maliogka VI, Dovas CI. Viruses of the genus *Allium* in the Mediterranean region. Adv. Virus Res. 2012; 84: 163-208.
3. Sako I. Occurrence of *Garlic latent virus* in *Allium* species. Plant Prot. 1989; 43: 389-392
4. Turina M, Tavella L, Ciuffo M. Tospoviruses in the Mediterranean area. Adv. Virus Res. 2012; 84: 403-437.
5. Marais A, Faure C, Bergey B, Candresse T. Viral Double-Stranded RNAs (dsRNAs) from Plants: Alternative Nucleic Acid Substrates for High-Throughput Sequencing. Methods Mol. Biol. 2018 ; 1746: 45-53.
6. Candresse T, Marais A, Faure C, Gentit P. Association of *Little cherry virus 1* (LChV1) with the Shirofugen stunt disease and characterization of the genome of a divergent LChV1 isolate. Phytopathology. 2013 ; 103: 293-298.

7. Altschul SF, Gish W, Miller W, Myers EW, Lipman DJ. Basic local alignment search tool. *J. Mol. Biol.* 2010; 215: 403-410.
8. Foissac X, Svanella-Dumas L, Gentit P, Dulucq MJ, Marais A, Candresse T. Polyvalent degenerate oligonucleotides reverse transcription-polymerase chain reaction: A polyvalent detection and characterization tool for Trichoviruses, Capilloviruses, and Foveaviruses. *Phytopathology.* 2005 ; 95: 617-625.
9. Marais A, Faure C, Couture C, Bergey B, Gentit P, Candresse T. Characterization by deep sequencing of divergent *Plum bark necrosis stem pitting-associated virus* (PBNSPaV) isolates and development of a broad-spectrum PBNSPaV detection assay. *Phytopathology.* 2014 ;104: 660-666.
10. Youssef F, Marais A, Faure C, Barone M, Gentit P, Candresse T. Characterization of *Prunus*-infecting Apricot latent virus-like Foveaviruses: Evolutionary and taxonomic implications. *Virus Res.* 2011 ; 155: 440-445
11. Tamura K, Stecher G, Peterson D, Filipski A, Kumar S. MEGA6: Molecular Evolutionary Genetics Analysis version 6.0. *Mol. Biol. Evol.* 2013; 30: 2725-2729.
12. Thompson JD, Higgins DG, Gibson TJ. CLUSTALW: improving the sensitivity of progressive multiple sequence alignment through sequence weighting, position-specific gap, penalties and weight matrix choice. *Nucleic Acids Res.* 1994; 22: 4673-4680.
13. Adams MJ, Zerbini FM, French R, Rabenstein F, Steger DC, Valkonen JPT. Family *Potyviridae*. In: King AMQ, Adams MJ, Carstens EB, Lefkowitz EJ, editors. *Virus Taxonomy – Ninth Report on the International Committee on Taxonomy of Viruses.* Elsevier Academic Press; 2012. Pp 1069-1089

14. Adams MJ, Antoniw JF, Beaudoin F. Overview and analysis of the polyprotein cleavage sites in the family *Potyviridae*. *Mol. Plant Pathol.* 2005; 6: 471-487.
15. Blanc S, Lopez-Moya JJ, Wang R, Garcia-Lampasona S, Thornbury DW, Pirone TP. A specific interaction between coat protein and helper component correlates with aphid transmission of a potyvirus. *Virology.* 1997; 231:141-147.
16. Wylie SJ, Adams M, Chalam C, Kreuze J, Lopez-Moya JJ, Oshima K et al. ICTV Virus Taxonomy Profile: *Potyviridae*. *J. Gen. Virol.* 2017; 98: 352–354
17. Adams MJ, Candresse T, Hammond J, Kreuze JF, Martelli GP, Namba S et al. Family *Betaflexiviridae*. In: King AMQ, Adams MJ, Carstens EB, Lefkowitz EJ, editors. *Virus Taxonomy – Ninth Report on the International Committee on Taxonomy of Viruses*. Elsevier Academic Press; 2012. pp 920-941.
18. Adams MJ, Candresse T, Hammond J, Kreuze JF, Martelli GP, Namba S et al. Family *Alphaflexiviridae*. In: King AMQ, Adams MJ, Carstens EB, Lefkowitz EJ, editors. *Virus Taxonomy – Ninth Report on the International Committee on Taxonomy of Viruses*. Elsevier Academic Press; 2012. pp 905-919
19. Perez-Egusquiza Z, Ward LI, Clover GRG, Fletcher JD, Van Der Vlugt RAA. First report of Shallot virus X in New Zealand. *Plant Pathol.* 2009; 58: 407.
20. Wilcoxon F. Individual comparisons by ranking methods, *Biometrics Bull.* 1945; 1: 80-83
21. Mann HB, Whitney DR. On a test of whether one of two random variables is stochastically larger than the other. *Ann. Math. Stat.* 1947; 18: 50-60.
22. Rodriguez-Cerezo E, Klein PG, Shaw JG. A determinant of disease symptom severity is located in the 3'-terminal noncoding region of the RNA of a plant virus. *Proc. Natl. Acad. Sci.* 1991; 88: 9863-9867.

23. Revers F, García JA. Molecular biology of potyviruses. *Adv. Virus Res.* 2015; 92: 101-199.
24. Majumder S, Baranwal VK. Sequence comparison and phylogeny of nucleotide sequence of coat protein and nucleic acid binding protein of a distinct isolate of Shallot virus X from India. *Indian J. Virol.* 2011; 22: 63-65

## Supporting information

**S1 Fig. Neighbor-joining tree reconstructed from the alignment of amino acid sequences of the coat protein of allexivirus members and shallot virus X isolates.** Validity of branches was evaluated by bootstrap analysis (1,000 replicates). Only bootstrap values above 70% are shown. The scale bar represents 5% amino acid divergence. The sequences of ShVX determined in this work are underlined. Potato virus X (NC011620, genus *Potexvirus*) was used as outgroup.

**S2 Fig. Neighbor-joining tree reconstructed from the alignment of nucleotide sequences of a partial fragment (247 nt) of the coat protein gene obtained from a range of shallot mild yellow stripe associated virus isolates.** Statistical significance of the branches was evaluated by bootstrap analysis (1,000 replicates). Only bootstrap values higher than 70% are indicated. The scale bar represents 5% nucleotide divergence. The primer pair used for the RT-PCR (ShMYSV-F1/ShMYSV-R1) is indicated in Table S1. Relevant nucleotide sequences were deposited in the GenBank database under accession numbers MG910501 to MG910598. Isolates found in co-infection with onion yellow dwarf virus or leek yellow stripe virus are indicated in italics. The scores of leaves striping (S) and loss of vigor (V) are indicated

(scale of notation from 0 to 3). The two identified phylogenetic clusters are indicated on the right of the figure.

**S1 Table. Oligonucleotides used in the present study for the completion of the seven viral genomes and the detection of onion dwarf virus and leek yellow stripe virus**

**S2 Table. Percentages of identities in nucleotides (nt) and in amino acids (aa) between shallot mild yellow stripe associated virus and members of the genus *Potyvirus* over the large ORF and in two genomic regions**

**S3 Table. Percentage of identity in the replicase and coat protein genes and deduced proteins between shallot virus S and closest relative carlaviruses <sup>a</sup>.**

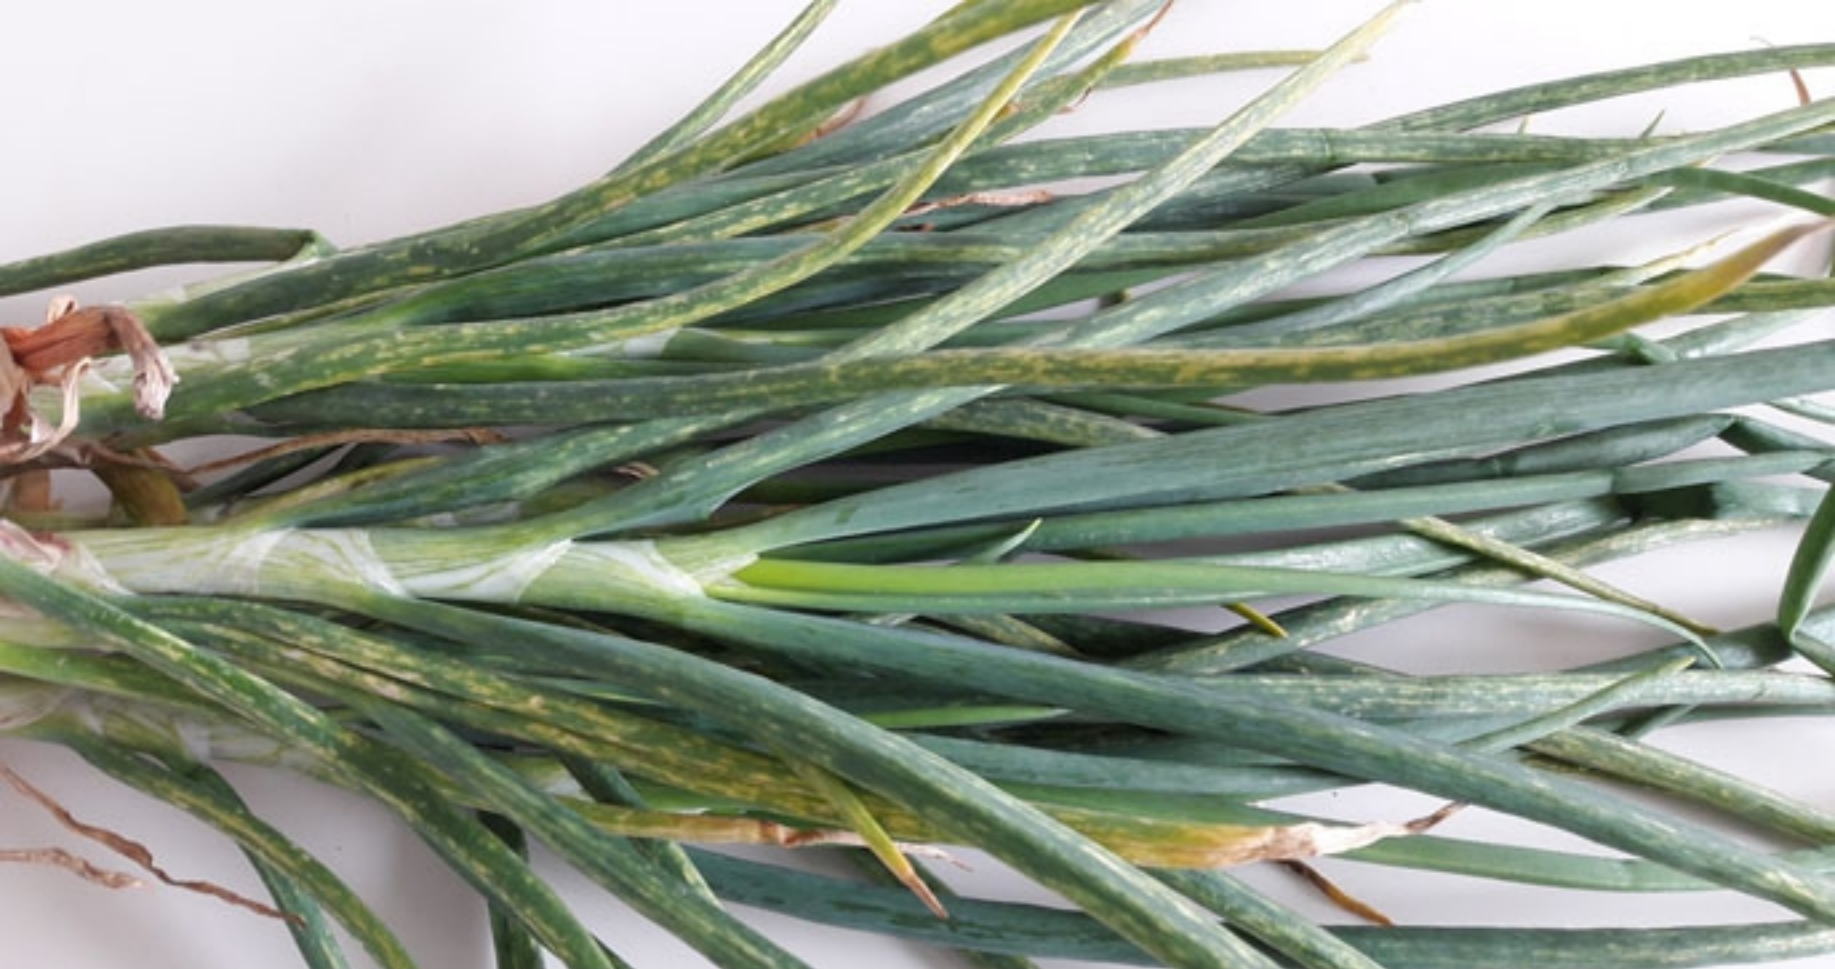

Fig 1

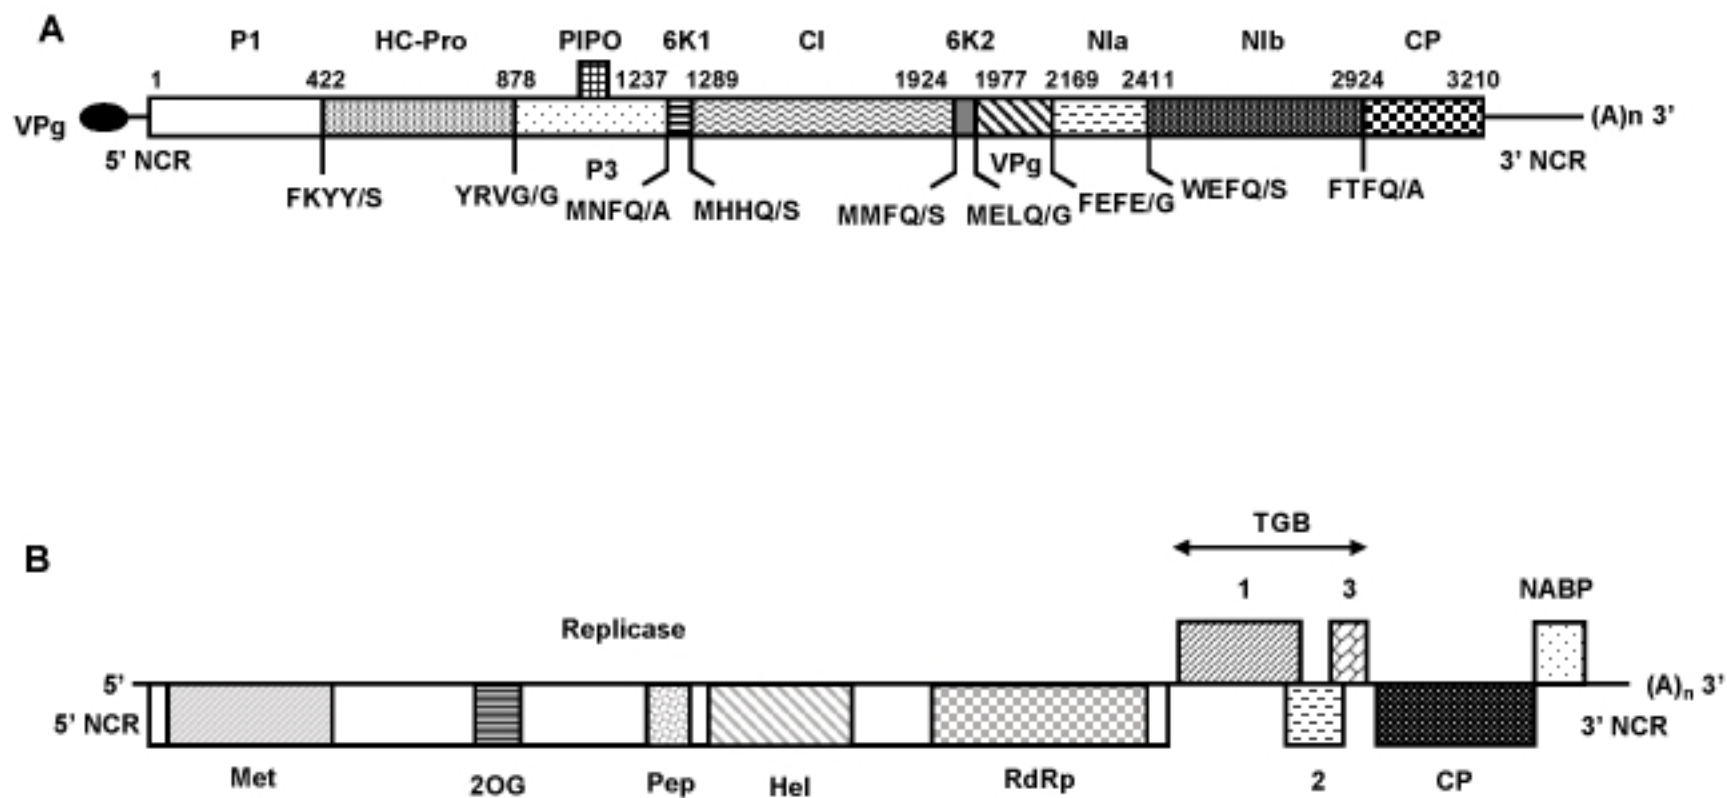

Fig 2





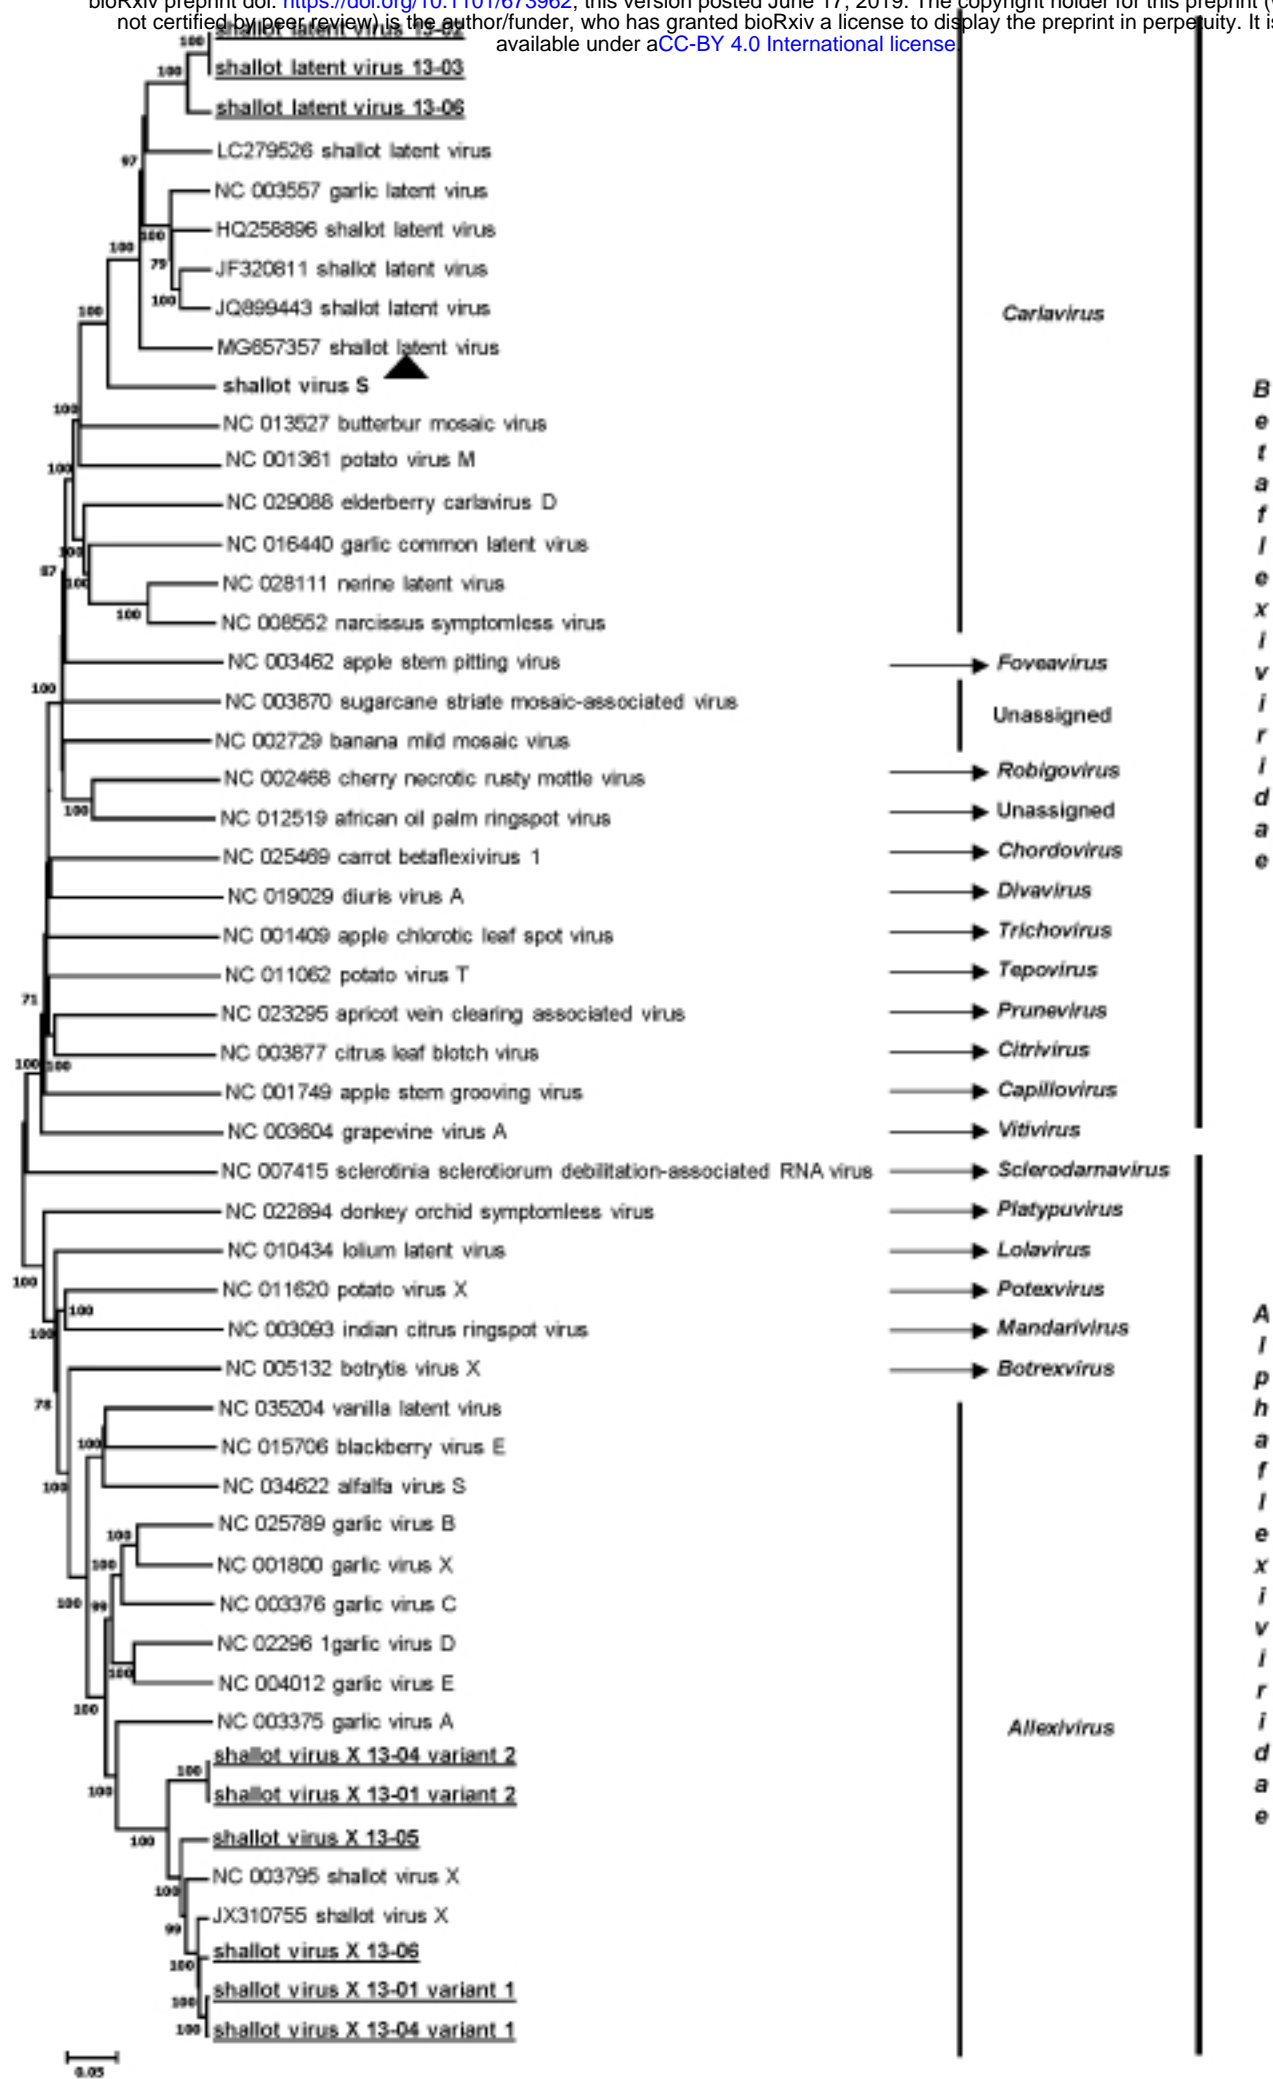

Fig 4

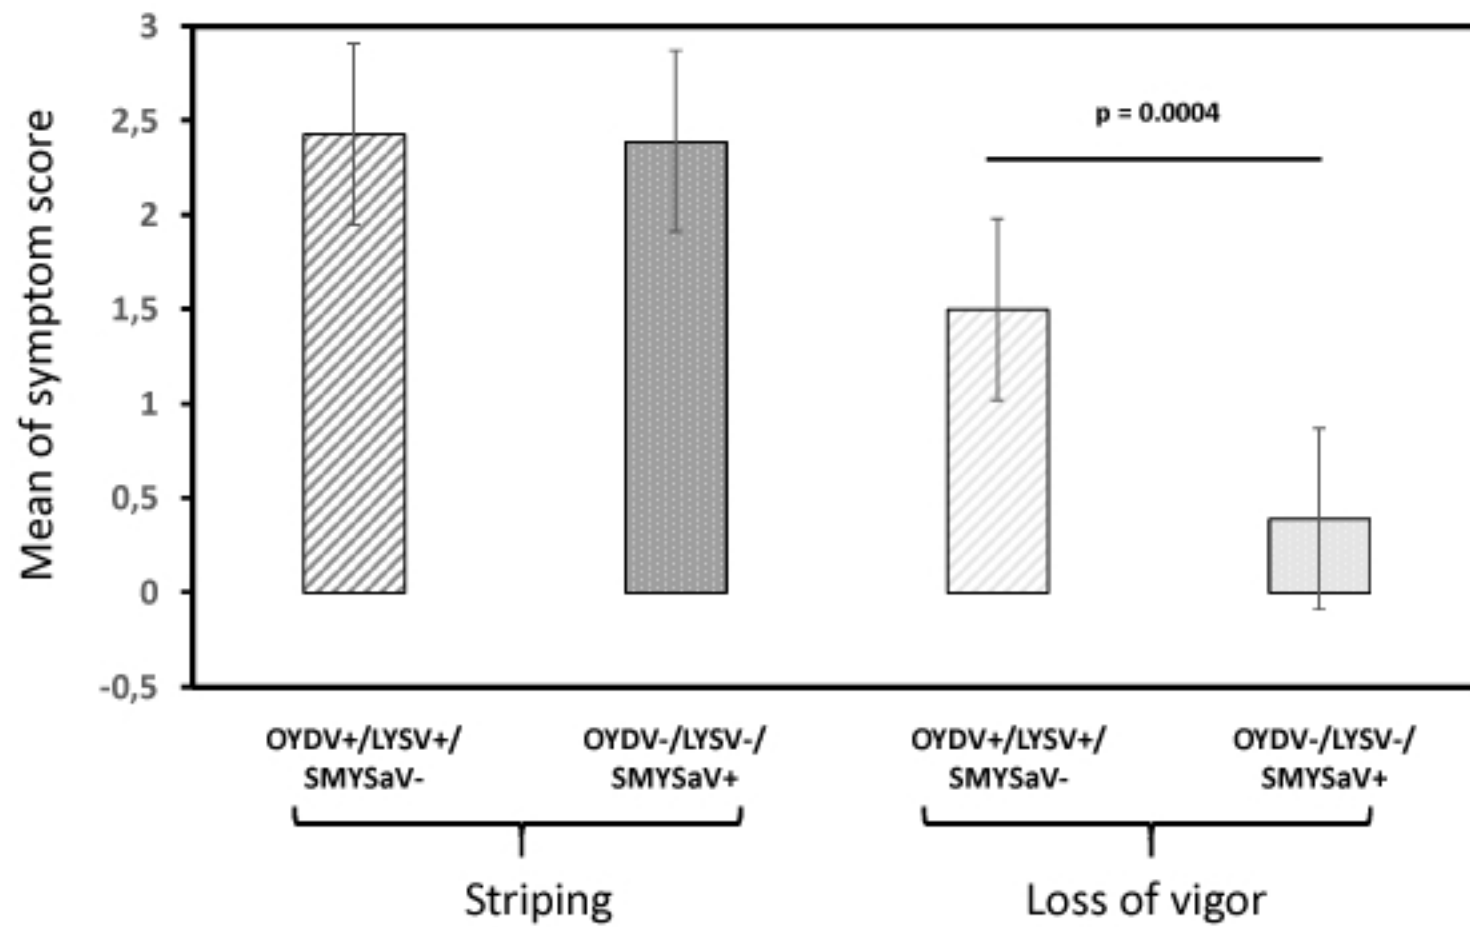

Fig 5
